# Supplementary material for: Effect of proprioceptive neuromuscular facilitation on pain and joint mobility in knee osteoarthritis: a systematic review and meta-analysis of randomized controlled trials
Source: PeerJ. 2026 Jan 16;14:e20581. doi: 10.7717/peerj.20581 (PMC12814904; doi:10.7717/peerj.20581)
Supplement: Supplemental Information 5 [file peerj-14-20581-s005.xlsx]

## Sheet: PNF vs control
ID	Author	Year	outcome	Experimental Group (n)	Control Group (n)	Control Baseline Mean	Control Baseline SD	Experimental Baseline Mean	Experimental Baseline SD	Control Post-test Mean	Control Post-test SD	Experimental Post-test Mean	Experimental Post-test SD
1	Shen et al.	2024	VAS	14	13	7	2.8	5.7	3.2	6.9	1.7	2.6	2.1
2	Gao et al.	2023	VAS	13	14	4.14	1.34	4.31	1.45	3.64	2.29	1.8	1.28
3	Song et al.	2020	VAS-WOMAC	13	16	3.16	1.1	3.19	1.47	3.21	1.18	0.55	0.48
4	Li et al.	2018	VAS	30	30	8.1	2	8.2	1.8	4.6	0.3	2.8	0.5
5	Weng et al.	2009	VAS	30	28	4.7	1.6	4.9	1.4	3.6	0.7	2.7	1.9
1	Shen et al.	2024	knee AROM	14	13	103.7	9.5	108.2	8.4	102.2	11	115.1	11.4
5	Weng et al.	2009	knee AROM	30	28	97	14	98	16	102	17	115	17

## Sheet: PNF vs RT
ID	Author	Year	outcome	Experimental Group (n)	Control Group (n)	Control Baseline Mean	Control Baseline SD	Experimental Baseline Mean	Experimental Baseline SD	Control Post-test Mean	Control Post-test SD	Experimental Post-test Mean	Experimental Post-test SD
1	Anjum et al.	2023	VAS	27	30	7.33	0.8	7.27	0.92	1.13	1.25	3.66	1.36
2	Zhang et al.	2023	VAS	20	20	5.17	1.16	5.01	1.19	4.19	1.26	1.82	0.67
3	Nafees et al.	2023	VAS	24	24	7.52	1.56	7.52	1.47	2.41	0.91	2.21	0.79
5	Weng et al.	2009	VAS	30	27	4.7	1.2	4.9	1.4	3.1	0.8	2.7	1.9
2	Zhang et al.	2023	knee AROM	20	20	108.62	5.24	107.1	5.13	111.88	5.98	114.23	6.11
5	Weng et al.	2009	knee AROM	30	27	97	12	98	16	107	16	115	17
